# Supplementary material for: Significant influence of water molecules on the SO3 + HCl reaction in the gas phase and at the air–water interface
Source: Royal Society of Chemistry journal article supplement (doi:10.1039/d3cp03172a), 2023-01-01
Supplement: d3cp03172a4.pdf [file d3cp03172a4.pdf]

## Supporting information

-for-

### Significant influence of water molecule on the SO<sub>3</sub> + HCl reaction in the gas phase and at the air-water interface

Yang Cheng<sup>a,‡</sup>, Chao Ding<sup>a,‡</sup>, Hui Wang<sup>a</sup>, Tianlei Zhang<sup>a,\*</sup>, Rui Wang<sup>a</sup>, Balaganesh Muthiah<sup>b</sup>,  
Haitong Xu<sup>a</sup>, Qiang Zhang<sup>a</sup>, Min Jiang<sup>a</sup>

<sup>a</sup> Institute of Theoretical and Computational Chemistry, Shaanxi Key Laboratory of Catalysis, School of Chemical & Environment Science, Shaanxi University of Technology, Hanzhong, Shaanxi 723001, P. R. China

<sup>b</sup> Department of Chemistry, National Taiwan University, Taipei 106, Taiwan.

**Fig. S1** The optimized geometrical structures for the species of the SO<sub>3</sub> and HCl at several different levels of theory. The values in parentheses are the experimental values. <sup>a</sup> The values obtained at the MP2/6-311+G(3d,2p) level of theory; <sup>b</sup> The values obtained at the MP2/6-311+G(2df,2pd) level of theory, <sup>c</sup> The values obtained at the MP2/aug-cc-pVDZ level of theory, <sup>d</sup> The values obtained at the MP2/aug-cc-pVTZ level of theory, <sup>e</sup> The values obtained at the MP2/6-311++G(3df,2pd) level of theory; bond length is in angstrom and angle is in degree.

**Table S1** Unscaled vibrational frequencies obtained at different levels

**Table S2** The energy barriers ( $\Delta E$ ) and unsigned error (UE) (in kcal·mol<sup>-1</sup>) for the SO<sub>3</sub> + HCl → ClSO<sub>3</sub>H reaction at different theoretical methods with zero-point energy (ZPE) correction

**Table S3** Relative energies ( $\Delta E$  and  $\Delta(E + ZPE)$ /(kcal·mol<sup>-1</sup>)), enthalpies ( $\Delta H$ /(kcal·mol<sup>-1</sup>)), entropy (S(298 K)/(cal·mol<sup>-1</sup>·K<sup>-1</sup>)) and free energies ( $\Delta G$ (298 K)/(kcal·mol<sup>-1</sup>)) for the reactants, pre-reactive complexes, transition states, post-reactive complexes and products involved in the SO<sub>3</sub> + HCl → ClSO<sub>3</sub>H reaction without and with H<sub>2</sub>O and (H<sub>2</sub>O)<sub>2</sub>, as well as the hydrolysis reaction of SO<sub>3</sub> without and with H<sub>2</sub>O

**Table S4** Relative energies ( $\Delta E$  and  $\Delta(E + ZPE)$ /(kcal·mol<sup>-1</sup>)), enthalpies ( $\Delta H$ /(kcal·mol<sup>-1</sup>)), entropy (S(298 K)/(cal·mol<sup>-1</sup>·K<sup>-1</sup>)) and free energies ( $\Delta G$ (298 K)/(kcal·mol<sup>-1</sup>)) for the reactants, pre-reactive complexes, transition states, post-reactive complexes and products involved in the SO<sub>3</sub> + HCl → ClSO<sub>3</sub>H reaction at the CCSD(T)-F12/cc-pVDZ-F12//BLYP-D3/6-311+G(3d,2p) level

**Table S5** Equilibrium coefficients for the complexes of SO<sub>3</sub>···HCl, SO<sub>3</sub>···H<sub>2</sub>O, SO<sub>3</sub>···(H<sub>2</sub>O)<sub>2</sub>, HCl···H<sub>2</sub>O, and HCl···(H<sub>2</sub>O)<sub>2</sub> within the altitudes range of 0-50 km

---

\* Corresponding authors. Tel: +86-0916-2641083, Fax: +86-0916-2641083.

E-Mail: ztianlei88@l63.com (T. L. Zhang)

‡ Yang Cheng and Chao Ding contributed equally to this work.

**Table S6** Concentrations ( $\text{molecules}\cdot\text{cm}^{-3}$ ) of  $\text{SO}_3\cdots\text{HCl}$ ,  $\text{SO}_3\cdots\text{H}_2\text{O}$ ,  $\text{SO}_3\cdots(\text{H}_2\text{O})_2$ ,  $\text{HCl}\cdots\text{H}_2\text{O}$ , and  $\text{HCl}\cdots(\text{H}_2\text{O})_2$  within the temperature range of 280-320 K

**Fig. S2** Schematic energy diagrams for the hydrolysis reaction of  $\text{SO}_3$  without (a) and with (b)  $\text{H}_2\text{O}$  at the CCSD(T)-F12/cc-pVDZ-F12//MP2/6-311+G(3d,2p) level of theory

**Fig. S3** The simulated trajectories of  $\text{SO}_3 + \text{HCl}$  reaction (a),  $\text{H}_2\text{O}$  catalyzed  $\text{SO}_3 + \text{HCl}$  reaction (b),  $(\text{H}_2\text{O})_2$  catalyzed  $\text{SO}_3 + \text{HCl}$  reaction (c),  $\text{SO}_3 + \text{H}_2\text{O}$  reaction (d), and  $\text{H}_2\text{O}$  catalyzed  $\text{SO}_3 + \text{H}_2\text{O}$  reaction (e) in the gas phase

### Part 1. Calculations of reaction rate coefficients

**Table S7** Rate coefficient ( $\text{cm}^3\cdot\text{molecule}^{-1}\cdot\text{s}^{-1}$ ) for the  $\text{SO}_3 + \text{HCl}$  reaction without and with  $\text{H}_2\text{O}$ , and  $(\text{H}_2\text{O})_2$  as well as the hydrolysis of  $\text{SO}_3$  without and with  $\text{H}_2\text{O}$  and  $\text{HCl}$ , along with the effective rate coefficient ( $\text{cm}^3\cdot\text{molecule}^{-1}\cdot\text{s}^{-1}$ ) for the  $\text{SO}_3 + \text{HCl}$  reaction with  $\text{H}_2\text{O}$ , and  $(\text{H}_2\text{O})_2$  as well as the hydrolysis of  $\text{SO}_3$  with  $\text{H}_2\text{O}$  and  $\text{HCl}$  within the temperature range of 280-320 K at 0 km

**Table S8** Rate coefficient ( $\text{cm}^3\cdot\text{molecule}^{-1}\cdot\text{s}^{-1}$ ) and atmospheric lifetimes ( $\tau$ , s) of  $\text{SO}_3$  for the hydrolysis of  $\text{SO}_3$  without and with  $\text{H}_2\text{O}$  within the altitudes range of 0-50 km

**Table S9** The rate coefficient for the hydrolysis of  $\text{SO}_3$  starting from  $\text{SO}_3\cdots\text{H}_2\text{O}$ ,  $\text{SO}_3\cdots\text{H}_2\text{O} + \text{HCl}$  reaction, the hydrolysis of  $\text{SO}_3$  with  $\text{H}_2\text{O}$  starting from  $\text{SO}_3\cdots(\text{H}_2\text{O})_2$  and  $\text{SO}_3\cdots(\text{H}_2\text{O})_2 + \text{HCl}$  reaction; Atmospheric lifetimes ( $\tau$ , s) of  $\text{SO}_3\cdots\text{H}_2\text{O}$  for the hydrolysis of  $\text{SO}_3$  starting from  $\text{SO}_3\cdots\text{H}_2\text{O}$  and the  $\text{SO}_3\cdots\text{H}_2\text{O} + \text{HCl}$  reaction as well as the atmospheric lifetimes ( $\tau$ , s) of  $\text{SO}_3\cdots(\text{H}_2\text{O})_2$  for the hydrolysis of  $\text{SO}_3$  with  $\text{H}_2\text{O}$  starting from  $\text{SO}_3\cdots(\text{H}_2\text{O})_2$  and the  $\text{SO}_3\cdots(\text{H}_2\text{O})_2 + \text{HCl}$  reaction within the altitude range of 0-50 km

**Fig. S4** The simulated trajectories of the formation of  $\text{ClSO}_3\cdots\text{H}_3\text{O}^+$  ion pair from the reaction of  $\text{SO}_3$ ,  $\text{HCl}$  and one interfacial water molecular at the air-water interface

**Fig. S5** The simulated trajectories of the formation of  $\text{ClSO}_3\cdots\text{H}_3\text{O}^+$  ion pair from the reaction of  $\text{SO}_3$ ,  $\text{HCl}$  and two interfacial water molecular at the air-water interface

**Fig. S6** The simulated trajectories of the  $\text{HSO}_4\cdots\text{H}_3\text{O}^+$  ion pair formation from  $\text{SO}_3$ ,  $\text{HCl}$  and two interfacial water molecules at the air-water interface

**Fig. S7** The optimized geometrical structure for the  $\text{ClSO}_3^-$  ion at the MP2/6-311+G(3d,2p) level

**Fig. S8** The optimized geometrical structure for the  $\text{ClSO}_3^-$  ion at the MP2/6-311+G(3d,2p) level

**Fig. S9** The z coordinates of  $\text{ClSO}_3^-$  ion as the function of simulation time (a), the density profile of water (b) and the pie chart with the occurrence percentages of  $\text{ClSO}_3^-$  ion (c) at the air-water interface and in water phase

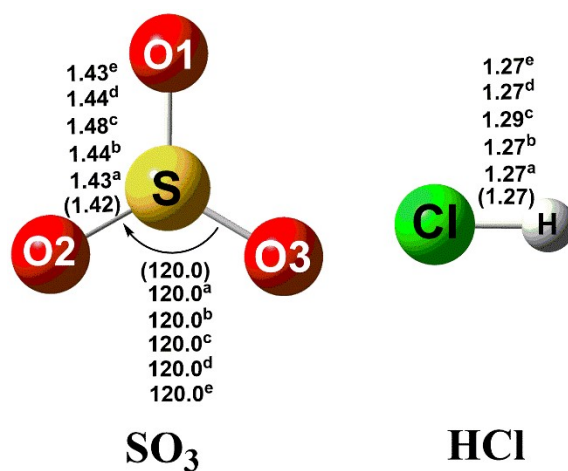

**Fig. S1** The optimized geometrical structures for the species of the  $\text{SO}_3$  and  $\text{HCl}$  at several different levels of theory. The values in parentheses are the experimental values. <sup>a</sup> The values obtained at the  $\text{MP2}/6\text{-}311+\text{G}(3d,2p)$  level of theory; <sup>b</sup> The values obtained at the  $\text{MP2}/6\text{-}311+\text{G}(2df,2pd)$  level of theory, <sup>c</sup> The values obtained at the  $\text{MP2}/\text{aug-cc-pVDZ}$  level of theory, <sup>d</sup> The values obtained at the  $\text{MP2}/\text{aug-cc-pVTZ}$  level of theory, <sup>e</sup> The values obtained at the  $\text{MP2}/6\text{-}311++\text{G}(3df,2pd)$  level of theory; bond length is in angstrom and angle is in degree.

**Table S1** Unscaled vibrational frequencies obtained at different levels

| SO <sub>3</sub>                         |                                                      |                                                       |
|-----------------------------------------|------------------------------------------------------|-------------------------------------------------------|
| Method                                  | Theoretical Frequencies<br>(unit: cm <sup>-1</sup> ) | Experimental Frequencies<br>(unit: cm <sup>-1</sup> ) |
| MP2/6-311+G(3 <i>d</i> ,2 <i>p</i> )    | 494 513 513 1049 1379 1379                           | 498 530 530 1065 1391 1391                            |
| MP2/6-311+G(2 <i>df</i> ,2 <i>pd</i> )  | 488 521 521 1053 1408 1408                           |                                                       |
| MP2/6-311++G(3 <i>df</i> ,2 <i>pd</i> ) | 503 523 523 1068 1421 1421                           |                                                       |
| MP2/aug-cc-pVDZ                         | 454 469 469 974 1324 1324                            |                                                       |
| MP2/aug-cc-pVTZ                         | 480 505 505 1037 1389 1389                           |                                                       |
| HCl                                     |                                                      |                                                       |
| Method                                  | Theoretical frequencies<br>(unit: cm <sup>-1</sup> ) | Experimental frequencies<br>(unit: cm <sup>-1</sup> ) |
| MP2/6-311+G(3 <i>d</i> ,2 <i>p</i> )    | 3026                                                 | 2990                                                  |
| MP2/6-311+G(2 <i>df</i> ,2 <i>pd</i> )  | 3055                                                 |                                                       |
| MP2/6-311++G(3 <i>df</i> ,2 <i>pd</i> ) | 3055                                                 |                                                       |
| MP2/aug-cc-pVDZ                         | 3023                                                 |                                                       |
| MP2/aug-cc-pVTZ                         | 3045                                                 |                                                       |

The vibrational frequencies of SO<sub>3</sub> and HCl reactants among the methods of MP2/6-311+G(3*d*,2*p*), MP2/6-311+G(2*df*,2*pd*), MP2/aug-cc-pVTZ and MP2/6-311++G(3*df*,2*pd*) have been compared with the corresponding experimental values (From the NIST chemistry webbook, <http://webbook.nist.gov/chemistry>). As seen in Table S3, for the species of SO<sub>3</sub> and HCl, the average absolute deviation between the calculated harmonic vibrational frequencies at the MP2/6-311+G(3*d*,2*p*), MP2/6-311+G(2*df*,2*pd*), MP2/aug-cc-pVTZ and MP2/6-311++G(3*df*,2*pd*) levels of theory and the corresponding experimental ones are 1.66%, 2.13%, 2.26%, 3.05% and 4.72%, respectively. This further indicates that the calculated data for the title reaction at the MP2/6-311+G(3*d*,2*p*) level of theory is acceptable as the fact that the average absolute deviation between the calculated bond distances, bond angles and vibrational frequencies at the MP2/6-311+G(3*d*,2*p*) level and the corresponding experimental values is the smallest among the five different theoretical methods.

**Table S2** The energy barriers ( $\Delta E$ ) and unsigned error (UE) (in kcal·mol<sup>-1</sup>) for the SO<sub>3</sub> + HCl → ClSO<sub>3</sub>H reaction at different theoretical methods with zero-point energy (ZPE) correction

| Methods                                           | $\Delta E^a$ | $\Delta E^b$ | $\Delta E^c$ | UE   |
|---------------------------------------------------|--------------|--------------|--------------|------|
| CCSD(T)-F12/cc-pVQZ-F12//MP2/6-311+G(3d,2p)       | -3.0         | -19.0        | -11.7        | 0.00 |
| CCSD(T)/CBS//MP2/6-311+G(3d,2p)                   | -3.0         | 18.5         | -12.1        | 0.30 |
| CCSD(T)-F12/cc-pVDZ-F12//MP2/6-311+G(3d,2p)       | -3.0         | 19.6         | -11.3        | 0.30 |
| CCSD(T)/aug-cc-pVTZ//MP2/6-311+G(3d,2p)           | -3.0         | 19.5         | -10.1        | 0.57 |
| DLPNO-CCSD(T)-F12/cc-pVDZ-F12//MP2/6-311+G(3d,2p) | -2.7         | 19.9         | -11.5        | 0.47 |
| CCSD(T)/cc-pVTZ//MP2/6-311+G(3d,2p)               | -2.1         | 20.4         | -8.2         | 2.23 |
| CCSD(T)/aug-cc-pVDZ//MP2/6-311+G(3d,2p)           | -3.0         | 20.4         | -5.7         | 2.47 |

<sup>a</sup>, <sup>b</sup> and <sup>c</sup> respectively denote the species of pre-reactive complexes, transition states and product involved in SO<sub>3</sub> + HCl reaction.

Based on the MP2/6-311+G(3d,2p)-optimized geometries, single-point energy calculation was performed at a series of calculated methods of CCSD(T)-F12/cc-pVQZ-F12, CCSD(T)/CBS, CCSD(T)-F12/cc-pVDZ-F12, DLPNO-CCSD(T)-F12/cc-pVDZ-F12, CCSD(T)/aug-cc-pVTZ, CCSD(T)/aug-cc-pVDZ and CCSD(T)/cc-pVTZ. It is reported that the CCSD(T)-F12/cc-pVQZ-F12 (*Mol Phys.*, 2010, 108, 315-325.; *J. Chem. Theory. Comput.*, 2012, 8, 3175-3186) energy is the well-recognized “gold standard” with an accuracy better than 0.01 kcal·mol<sup>-1</sup>. Thus, the single-point energy at the CCSD(T)-F12/cc-pVQZ-F12 level can be used as a benchmark for selecting the most appropriate method of calculating the energy. As seen in Table S4, the average absolute deviation between the calculated energies at the CCSD(T)/CBS, CCSD(T)-F12/cc-pVDZ-F12, DLPNO-CCSD(T)-F12/cc-pVDZ-F12, CCSD(T)/aug-cc-pVTZ, CCSD(T)/aug-cc-pVDZ and CCSD(T)/cc-pVTZ levels of theory and the corresponding CCSD(T)-F12/cc-pVQZ-F12 are 0.30 kcal·mol<sup>-1</sup>, 0.30 kcal·mol<sup>-1</sup>, 0.57 kcal·mol<sup>-1</sup>, 0.47 kcal·mol<sup>-1</sup>, 2.03 kcal·mol<sup>-1</sup> and 2.47 kcal·mol<sup>-1</sup>, respectively. This further indicates that compared with the single-point energy at the CCSD(T)-F12/cc-pVQZ-F12 level, the average absolute deviation at the CCSD(T)-F12/cc-pVDZ-F12 level is the smallest in six different theoretical methods. So, the single-point energy obtained at the CCSD(T)-F12/cc-pVDZ-F12//MP2/6-311+G(3d,2p) level is reasonable and acceptable. Taking into account the computational accuracy and cost, the CCSD(T)-F12/cc-pVDZ-F12//MP2/6-311+G(3d,2p) method has been selected to optimize geometrical structures and calculate the relative energies of all the species for the title reactions.

**Table S3** Relative energies ( $\Delta E$  and  $\Delta(E + ZPE)$ /(kcal·mol<sup>-1</sup>)), enthalpies ( $\Delta H$ /(kcal·mol<sup>-1</sup>)), entropy (S(298 K)/(cal·mol<sup>-1</sup>·K<sup>-1</sup>)) and free energies ( $\Delta G$ (298 K)/(kcal·mol<sup>-1</sup>)) for the reactants, pre-reactive complexes, transition states, post-reactive complexes and products involved in the SO<sub>3</sub> + HCl → ClSO<sub>3</sub>H reaction without and with H<sub>2</sub>O and (H<sub>2</sub>O)<sub>2</sub>, as well as the hydrolysis reaction of SO<sub>3</sub> without and with H<sub>2</sub>O at the CCSD(T)-F12/cc-pVDZ-F12//MP2/6-311+G(3d,2p) level

| <i>Species</i>                                           | ZPE  | $\Delta E$ | S     | $\Delta G$ | $\Delta(E + ZPE)$                               | $\Delta H$ |
|----------------------------------------------------------|------|------------|-------|------------|-------------------------------------------------|------------|
| SO <sub>3</sub> + HCl                                    | 11.9 | 0.0        | 106.1 | 0.0        | 0.0                                             | 0.0        |
| SO <sub>3</sub> ···HCl                                   | 12.7 | -3.8       | 87.1  | 2.8        | -3.0                                            | -2.8       |
| TS <sub>CSA</sub>                                        | 12.2 | 19.2       | 74.3  | 27.9       | 19.6                                            | 18.4       |
| ClSO <sub>3</sub> H                                      | 16.2 | -15.6      | 74.2  | -2.9       | -11.3                                           | -12.4      |
| SO <sub>3</sub> + HCl + H <sub>2</sub> O                 | 25.4 | 0.0        | 168.2 | 0.0        | 0.0                                             | 0.0        |
| SO <sub>3</sub> ···H <sub>2</sub> O + HCl                | 27.6 | -9.6       | 124.9 | -0.1       | -7.4                                            | -7.9       |
| SO <sub>3</sub> ···HCl + H <sub>2</sub> O                | 26.2 | -3.8       | 149.5 | 2.7        | -3.0                                            | -2.8       |
| HCl···H <sub>2</sub> O + SO <sub>3</sub>                 | 27.4 | -5.3       | 128.9 | 2.6        | -3.3                                            | -4.1       |
| SO <sub>3</sub> ···HCl···H <sub>2</sub> O                | 28.9 | -12.8      | 98.1  | 5.7        | -9.4                                            | -16.6      |
| TS <sub>CSA_WM</sub>                                     | 29.6 | -9.1       | 84.9  | 12.5       | -5.0                                            | -12.3      |
| ClSO <sub>3</sub> H···H <sub>2</sub> O                   | 32.0 | -28.7      | 89.0  | -5.3       | -22.1                                           | -29.4      |
| SO <sub>3</sub> + HCl + (H <sub>2</sub> O) <sub>2</sub>  | 41.2 | 0.0        | 175.3 | 0.0        | 0.0                                             | 0.0        |
| SO <sub>3</sub> ···(H <sub>2</sub> O) <sub>2</sub> + HCl | 44.3 | -16.6      | 135.9 | -2.8       | -13.5                                           | -14.6      |
| SO <sub>3</sub> ···HCl + (H <sub>2</sub> O) <sub>2</sub> | 42.0 | -3.8       | 156.7 | 2.7        | -3.0                                            | -2.8       |
| HCl···(H <sub>2</sub> O) <sub>2</sub> + SO <sub>3</sub>  | 43.7 | -8.7       | 143.4 | 2.2        | -6.2                                            | -7.4       |
| SO <sub>3</sub> ···HCl···(H <sub>2</sub> O) <sub>2</sub> | 45.0 | -17.6      | 111.0 | 4.1        | -13.9                                           | -15.1      |
| TS <sub>CSA_WD</sub>                                     | 44.6 | -17.4      | 104.2 | 5.2        | -14.0                                           | -16.0      |
| ClSO <sub>3</sub> H···(H <sub>2</sub> O) <sub>2</sub>    | 48.0 | -35.7      | 101.1 | -8.9       | -29.0                                           | -31.0      |
| SO <sub>3</sub> + H <sub>2</sub> O                       | 21.1 | 0.0        | 106.6 | 0.0        | 0.0                                             | 0.0        |
| SO <sub>3</sub> ···H <sub>2</sub> O                      | 23.2 | -9.6       | 80.3  | -0.1       | -7.4 (-7.6) <sup>a</sup> (-7.4) <sup>b</sup>    | -7.9       |
| TS <sub>SA</sub>                                         | 21.7 | 16.0       | 70.9  | 25.6       | 16.6 (16.0) <sup>a</sup> (16.3) <sup>b</sup>    | 15.0       |
| H <sub>2</sub> SO <sub>4</sub>                           | 24.8 | -23.7      | 72.2  | -11.2      | -20.1 (19.5) <sup>a</sup> (-20.36) <sup>b</sup> | -21.5      |
| SO <sub>3</sub> + 2H <sub>2</sub> O                      | 34.7 | 0.0        | 198.0 | 0.0        | 0.0                                             | 0.0        |
| SO <sub>3</sub> + (H <sub>2</sub> O) <sub>2</sub>        | 36.9 | -5.0       | 167.4 | 2.9        | -2.7 (-2.9) <sup>b</sup>                        | -3.3       |
| SO <sub>3</sub> ···H <sub>2</sub> O + H <sub>2</sub> O   | 36.8 | -9.6       | 167.9 | -0.1       | -7.4 (-7.4) <sup>b</sup>                        | -7.9       |
| IM <sub>SA_WM</sub>                                      | 40.0 | -21.6      | 128.0 | 0.2        | -16.3 (-16.6) <sup>b</sup>                      | -17.8      |
| TS <sub>SA_WM</sub>                                      | 39.0 | -15.0      | 118.1 | 7.6        | -10.6 (-11.1) <sup>b</sup>                      | -13.7      |
| H <sub>2</sub> SO <sub>4</sub> ···H <sub>2</sub> O       | 40.7 | -36.2      | 122.9 | -12.9      | -30.2 (-30.68) <sup>b</sup>                     | -32.3      |

<sup>a</sup> The values are reported from reference (*J. Phys. Chem. A*, **2019**, *123*, 3131-3141)

<sup>b</sup> The values are reported from reference (*Chem. Phys. Lett.*, **2013**, *581*, 26-29)

<sup>c</sup> The values are reported from reference (*J Am Chem Soc.*, **2012**, *153*, 20632-44)

**Table S4** Relative energies ( $\Delta E$  and  $\Delta(E + ZPE)$ /(kcal·mol<sup>-1</sup>)), enthalpies ( $\Delta H$ /(kcal·mol<sup>-1</sup>)), entropy (S(298 K)/(cal·mol<sup>-1</sup>·K<sup>-1</sup>)) and free energies ( $\Delta G$ (298 K)/(kcal·mol<sup>-1</sup>)) for the reactants, pre-reactive complexes, transition states, post-reactive complexes and products involved in the SO<sub>3</sub> + HCl → ClSO<sub>3</sub>H reaction at the CCSD(T)-F12/cc-pVDZ-F12//BLYP-D3/6-311+G(3d,2p) level

| <i>Species</i>         | ZPE  | $\Delta E$ | S     | $\Delta G$ | $\Delta(E + ZPE)$ | $\Delta H$ |
|------------------------|------|------------|-------|------------|-------------------|------------|
| SO <sub>3</sub> + HCl  | 11.1 | 0.0        | 106.5 | 0.0        | 0.0               | 0.0        |
| SO <sub>3</sub> ···HCl | 11.9 | -3.7       | 87.1  | 2.8        | -2.9              | -2.7       |
| TS <sub>CSA</sub>      | 11.3 | 20.9       | 74.3  | 29.2       | 19.               | 19.9       |
| ClSO <sub>3</sub> H    | 15.1 | -15.0      | 74.2  | -2.7       | -11.5             | -12.0      |

The DFT methods were used for the BOMD simulations benchmarked against the MP2 structures and CCSD(T) energies used to map the key structures along the PES for the SO<sub>3</sub> + HCl reaction. Specifically, the optimized geometries and vibrational frequencies of the reactants, pre-reactive complexes, transition states (TSs), post-reactive complexes and products were calculated using the BLYP-D3 method with 6-311+G(3d,2p) basis set by Gaussian 09 A.01 packages. At the same level, intrinsic reaction coordinate (IRC) calculations were used to determine the connectivity between the TSs and the suitable pre- and post-reactant complexes. Then, single point energy calculations were performed at the CCSD(T)-F12/cc-pVDZ-F12 level using ORCA. As seen in Table S2, the energies difference between CCSD(T)-F12/cc-pVDZ-F12//MP2/6-311+G(3d,2p) and CCSD(T)-F12/cc-pVDZ-F12//BLYP-D3/6-311+G(3d,2p) levels are less than 0.4 kcal·mol<sup>-1</sup>. Thus, the BLYP-D3 method was reliable to model the reaction pathway.

**Table S5** Equilibrium coefficients for the complexes of  $\text{SO}_3 \cdots \text{HCl}$ ,  $\text{SO}_3 \cdots \text{H}_2\text{O}$ ,  $\text{SO}_3 \cdots (\text{H}_2\text{O})_2$ ,  $\text{HCl} \cdots \text{H}_2\text{O}$ , and  $\text{HCl} \cdots (\text{H}_2\text{O})_2$  within the altitude range of 0-50 km

| Altitude /km | T/K    | $\text{SO}_3 \cdots \text{HCl}$ | $\text{SO}_3 \cdots \text{H}_2\text{O}$                           | $\text{SO}_3 \cdots (\text{H}_2\text{O})_2$                                                                  | $(\text{H}_2\text{O})_2$                                          | $\text{HCl} \cdots \text{H}_2\text{O}$                            | $\text{HCl} \cdots (\text{H}_2\text{O})_2$ |
|--------------|--------|---------------------------------|-------------------------------------------------------------------|--------------------------------------------------------------------------------------------------------------|-------------------------------------------------------------------|-------------------------------------------------------------------|--------------------------------------------|
|              | 280.00 | $1.58 \times 10^{-22}$          | $3.31 \times 10^{-20}$                                            | $7.12 \times 10^{-18}$                                                                                       | $3.60 \times 10^{-22}$                                            | $7.53 \times 10^{-22}$                                            | $2.09 \times 10^{-21}$                     |
|              | 290.00 | $1.37 \times 10^{-22}$          | $2.11 \times 10^{-20}$                                            | $2.99 \times 10^{-18}$                                                                                       | $3.06 \times 10^{-22}$                                            | $6.08 \times 10^{-22}$                                            | $1.38 \times 10^{-21}$                     |
| 0            | 298.15 | $1.24 \times 10^{-22}$          | $1.51 \times 10^{-20}$<br>( $5.80 \times 10^{-20}$ ) <sup>a</sup> | $1.56 \times 10^{-18}$<br>( $4.94 \times 10^{-18}$ ) <sup>b</sup><br>( $2.16 \times 10^{-18}$ ) <sup>c</sup> | $2.71 \times 10^{-22}$<br>( $5.70 \times 10^{-22}$ ) <sup>a</sup> | $5.19 \times 10^{-22}$<br>( $5.50 \times 10^{-22}$ ) <sup>d</sup> | $1.01 \times 10^{-21}$                     |
|              | 300.00 | $1.21 \times 10^{-22}$          | $1.39 \times 10^{-20}$                                            | $1.34 \times 10^{-18}$                                                                                       | $2.63 \times 10^{-22}$                                            | $4.99 \times 10^{-22}$                                            | $9.34 \times 10^{-22}$                     |
|              | 310.00 | $1.07 \times 10^{-22}$          | $9.43 \times 10^{-21}$                                            | $6.28 \times 10^{-19}$                                                                                       | $2.29 \times 10^{-22}$                                            | $4.16 \times 10^{-22}$                                            | $6.50 \times 10^{-22}$                     |
|              | 320.00 | $9.63 \times 10^{-23}$          | $6.57 \times 10^{-21}$                                            | $3.10 \times 10^{-19}$                                                                                       | $2.02 \times 10^{-22}$                                            | $3.51 \times 10^{-22}$                                            | $4.63 \times 10^{-22}$                     |
| 5            | 259.30 | $2.22 \times 10^{-22}$          | $9.11 \times 10^{-20}$                                            | $5.48 \times 10^{-17}$                                                                                       | $5.59 \times 10^{-21}$                                            | $1.25 \times 10^{-21}$                                            | $5.59 \times 10^{-21}$                     |
| 10           | 229.70 | $4.05 \times 10^{-22}$          | $5.92 \times 10^{-19}$                                            | $1.71 \times 10^{-15}$                                                                                       | $2.94 \times 10^{-20}$                                            | $2.99 \times 10^{-21}$                                            | $2.94 \times 10^{-20}$                     |
| 15           | 212.60 | $6.33 \times 10^{-22}$          | $2.19 \times 10^{-18}$                                            | $1.99 \times 10^{-14}$                                                                                       | $9.60 \times 10^{-20}$                                            | $5.59 \times 10^{-21}$                                            | $9.60 \times 10^{-20}$                     |
| 20           | 215.50 | $5.81 \times 10^{-22}$          | $1.71 \times 10^{-18}$                                            | $1.25 \times 10^{-14}$                                                                                       | $7.68 \times 10^{-20}$                                            | $4.97 \times 10^{-21}$                                            | $7.68 \times 10^{-20}$                     |
| 25           | 218.60 | $5.35 \times 10^{-22}$          | $1.35 \times 10^{-18}$                                            | $8.00 \times 10^{-15}$                                                                                       | $6.19 \times 10^{-20}$                                            | $4.43 \times 10^{-21}$                                            | $6.19 \times 10^{-20}$                     |
| 30           | 223.70 | $4.70 \times 10^{-22}$          | $9.18 \times 10^{-19}$                                            | $3.89 \times 10^{-15}$                                                                                       | $4.37 \times 10^{-20}$                                            | $3.68 \times 10^{-21}$                                            | $4.37 \times 10^{-20}$                     |
| 35           | 235.10 | $3.60 \times 10^{-22}$          | $4.19 \times 10^{-19}$                                            | $8.87 \times 10^{-16}$                                                                                       | $2.14 \times 10^{-20}$                                            | $2.53 \times 10^{-21}$                                            | $2.14 \times 10^{-20}$                     |
| 40           | 249.90 | $2.63 \times 10^{-22}$          | $1.61 \times 10^{-19}$                                            | $1.46 \times 10^{-16}$                                                                                       | $8.97 \times 10^{-21}$                                            | $1.60 \times 10^{-21}$                                            | $8.97 \times 10^{-21}$                     |
| 45           | 266.10 | $1.97 \times 10^{-22}$          | $6.61 \times 10^{-20}$                                            | $2.67 \times 10^{-17}$                                                                                       | $3.96 \times 10^{-21}$                                            | $1.05 \times 10^{-21}$                                            | $3.96 \times 10^{-21}$                     |
| 50           | 271.00 | $1.81 \times 10^{-22}$          | $5.12 \times 10^{-20}$                                            | $1.64 \times 10^{-17}$                                                                                       | $3.13 \times 10^{-21}$                                            | $9.26 \times 10^{-22}$                                            | $3.13 \times 10^{-21}$                     |

<sup>a</sup> The value was taken from reference (*J. Phys. Chem. A*, **2019**, *123*, 3131-3141)

<sup>b</sup> The value was taken from reference (*J. Am. Chem. Soc.*, **2012**, *134*, 20632-20644)

<sup>c</sup> The value was taken from reference (*J. Phys. Chem. A*, **2017**, *121*, 3101-3108)

<sup>d</sup> The value was taken from reference (*J. Phys. Chem. A*, **2018**, *122*, 350-363)



**Table S6** Concentrations (molecules·cm<sup>-3</sup>) of SO<sub>3</sub>···HCl, SO<sub>3</sub>···H<sub>2</sub>O, SO<sub>3</sub>···(H<sub>2</sub>O)<sub>2</sub>, HCl···H<sub>2</sub>O, and HCl···(H<sub>2</sub>O)<sub>2</sub> within the temperature range of 280-320 K at 0 km

| Catalysts                                          | T/K     | 280                     | 290                     | 298                                                                                                           | 300                     | 310                     | 320                     |
|----------------------------------------------------|---------|-------------------------|-------------------------|---------------------------------------------------------------------------------------------------------------|-------------------------|-------------------------|-------------------------|
| H <sub>2</sub> O <sup>a</sup>                      | 20% RH  | 5.16 × 10 <sup>16</sup> | 9.56 × 10 <sup>16</sup> | 1.55 × 10 <sup>17</sup>                                                                                       | 1.72 × 10 <sup>17</sup> | 2.92 × 10 <sup>17</sup> | 4.70 × 10 <sup>17</sup> |
|                                                    | 40% RH  | 1.03 × 10 <sup>17</sup> | 1.91 × 10 <sup>17</sup> | 3.09 × 10 <sup>17</sup>                                                                                       | 3.43 × 10 <sup>17</sup> | 5.84 × 10 <sup>17</sup> | 9.40 × 10 <sup>17</sup> |
|                                                    | 60% RH  | 1.55 × 10 <sup>17</sup> | 2.87 × 10 <sup>17</sup> | 4.64 × 10 <sup>17</sup>                                                                                       | 5.15 × 10 <sup>17</sup> | 8.77 × 10 <sup>17</sup> | 1.41 × 10 <sup>18</sup> |
|                                                    | 80% RH  | 2.07 × 10 <sup>17</sup> | 3.82 × 10 <sup>17</sup> | 6.18 × 10 <sup>17</sup>                                                                                       | 6.86 × 10 <sup>17</sup> | 1.17 × 10 <sup>18</sup> | 1.88 × 10 <sup>18</sup> |
|                                                    | 100% RH | 2.58 × 10 <sup>17</sup> | 4.78 × 10 <sup>17</sup> | 7.73 × 10 <sup>17</sup>                                                                                       | 8.58 × 10 <sup>17</sup> | 1.46 × 10 <sup>18</sup> | 2.35 × 10 <sup>18</sup> |
| (H <sub>2</sub> O) <sub>2</sub>                    | 20% RH  | 9.59 × 10 <sup>11</sup> | 2.80 × 10 <sup>12</sup> | 6.51 × 10 <sup>12</sup>                                                                                       | 7.78 × 10 <sup>12</sup> | 1.95 × 10 <sup>13</sup> | 4.45 × 10 <sup>13</sup> |
|                                                    | 40% RH  | 3.82 × 10 <sup>12</sup> | 1.12 × 10 <sup>13</sup> | 2.59 × 10 <sup>13</sup>                                                                                       | 3.10 × 10 <sup>13</sup> | 7.81 × 10 <sup>13</sup> | 1.78 × 10 <sup>14</sup> |
|                                                    | 60% RH  | 8.65 × 10 <sup>12</sup> | 2.52 × 10 <sup>13</sup> | 5.83 × 10 <sup>13</sup>                                                                                       | 6.98 × 10 <sup>13</sup> | 1.76 × 10 <sup>14</sup> | 4.01 × 10 <sup>14</sup> |
|                                                    | 80% RH  | 1.54 × 10 <sup>13</sup> | 4.46 × 10 <sup>13</sup> | 1.03 × 10 <sup>14</sup>                                                                                       | 1.24 × 10 <sup>14</sup> | 3.14 × 10 <sup>14</sup> | 7.13 × 10 <sup>14</sup> |
|                                                    | 100% RH | 2.40 × 10 <sup>13</sup> | 6.99 × 10 <sup>13</sup> | 1.62 × 10 <sup>14</sup><br>(4.72 × 10 <sup>14</sup> ) <sup>b</sup><br>(4.55 × 10 <sup>14</sup> ) <sup>c</sup> | 1.94 × 10 <sup>14</sup> | 4.88 × 10 <sup>14</sup> | 1.11 × 10 <sup>14</sup> |
| SO <sub>3</sub> ···H <sub>2</sub> O                | 20% RH  | 1.71                    | 2.02                    | 2.34                                                                                                          | 2.39                    | 2.75                    | 3.09                    |
|                                                    | 40% RH  | 3.41                    | 4.03                    | 4.66                                                                                                          | 4.77                    | 5.51                    | 6.17                    |
|                                                    | 60% RH  | 5.13                    | 6.06                    | 7.00                                                                                                          | 7.16                    | 8.27                    | 9.26                    |
|                                                    | 80% RH  | 6.85                    | 8.06                    | 9.32                                                                                                          | 9.54                    | 11.0                    | 12.3                    |
|                                                    | 100% RH | 8.54                    | 10.1                    | 11.7                                                                                                          | 11.9                    | 13.8                    | 15.4                    |
| SO <sub>3</sub> ···(H <sub>2</sub> O) <sub>2</sub> | 20% RH  | 6.83 × 10 <sup>-3</sup> | 8.37 × 10 <sup>-3</sup> | 1.02 × 10 <sup>-2</sup>                                                                                       | 1.04 × 10 <sup>-2</sup> | 1.23 × 10 <sup>-2</sup> | 1.38 × 10 <sup>-2</sup> |
|                                                    | 40% RH  | 2.72 × 10 <sup>-2</sup> | 3.34 × 10 <sup>-2</sup> | 4.04 × 10 <sup>-2</sup>                                                                                       | 4.13 × 10 <sup>-2</sup> | 4.91 × 10 <sup>-2</sup> | 5.53 × 10 <sup>-2</sup> |
|                                                    | 60% RH  | 6.16 × 10 <sup>-2</sup> | 7.54 × 10 <sup>-2</sup> | 9.11 × 10 <sup>-2</sup>                                                                                       | 9.32 × 10 <sup>-2</sup> | 0.11                    | 0.12                    |
|                                                    | 80% RH  | 0.11                    | 0.13                    | 0.16                                                                                                          | 0.17                    | 0.20                    | 0.22                    |
|                                                    | 100% RH | 0.17                    | 0.21                    | 0.25                                                                                                          | 0.26                    | 0.31                    | 0.35                    |
| HCl···H <sub>2</sub> O                             | 20% RH  | 3.89 × 10 <sup>4</sup>  | 5.82 × 10 <sup>4</sup>  | 8.04 × 10 <sup>4</sup>                                                                                        | 8.59 × 10 <sup>4</sup>  | 1.21 × 10 <sup>5</sup>  | 1.65 × 10 <sup>5</sup>  |
|                                                    | 40% RH  | 7.76 × 10 <sup>4</sup>  | 1.16 × 10 <sup>5</sup>  | 1.60 × 10 <sup>5</sup>                                                                                        | 1.71 × 10 <sup>5</sup>  | 2.43 × 10 <sup>5</sup>  | 3.30 × 10 <sup>5</sup>  |
|                                                    | 60% RH  | 1.17 × 10 <sup>5</sup>  | 1.75 × 10 <sup>5</sup>  | 2.41 × 10 <sup>5</sup>                                                                                        | 2.57 × 10 <sup>5</sup>  | 3.64 × 10 <sup>5</sup>  | 4.94 × 10 <sup>5</sup>  |
|                                                    | 80% RH  | 1.56 × 10 <sup>5</sup>  | 2.32 × 10 <sup>5</sup>  | 3.21 × 10 <sup>5</sup>                                                                                        | 3.42 × 10 <sup>5</sup>  | 4.86 × 10 <sup>5</sup>  | 6.59 × 10 <sup>5</sup>  |
|                                                    | 100% RH | 1.94 × 10 <sup>5</sup>  | 2.91 × 10 <sup>5</sup>  | 4.01 × 10 <sup>5</sup>                                                                                        | 4.28 × 10 <sup>5</sup>  | 6.07 × 10 <sup>5</sup>  | 8.24 × 10 <sup>5</sup>  |
| HCl···(H <sub>2</sub> O) <sub>2</sub>              | 20% RH  | 2.00                    | 3.85                    | 6.56                                                                                                          | 7.27                    | 12.7                    | 20.6                    |
|                                                    | 40% RH  | 7.99                    | 15.4                    | 26.1                                                                                                          | 28.9                    | 50.8                    | 82.5                    |
|                                                    | 60% RH  | 18.1                    | 34.7                    | 58.7                                                                                                          | 65.2                    | 11.5                    | 18.6 × 10 <sup>2</sup>  |
|                                                    | 80% RH  | 32.3                    | 61.5                    | 1.04 × 10 <sup>2</sup>                                                                                        | 1.16 × 10 <sup>2</sup>  | 2.04 × 10 <sup>2</sup>  | 3.30 × 10 <sup>2</sup>  |
|                                                    | 100% RH | 50.1                    | 96.2                    | 1.63 × 10 <sup>2</sup>                                                                                        | 1.81 × 10 <sup>2</sup>  | 3.1 × 10 <sup>2</sup>   | 5.16 × 10 <sup>2</sup>  |

<sup>a</sup> The Concentrations (molecules·cm<sup>-3</sup>) of H<sub>2</sub>O and (H<sub>2</sub>O)<sub>2</sub> values were reported from reference (*J. Phys. Chem. A*, **2013**, *117*, 10381-10396)

<sup>b</sup> The values are reported from reference (*J. Am. Chem. Soc.*, **2021**, *143*, 8402–8413)

<sup>c</sup> The values are reported from reference (*RSC Adv.*, **2015**, *5*, 17623)

<sup>d</sup> The values are reported from reference (*Proc. Natl. Acad. Sci. U.S.A.*, **2019**;116(50):24966-24971)

<sup>e</sup> The values are reported from reference (*J. Phys. Chem. A*, **2018**; 122(1):350-363. *J. Phys. Chem. A*, **2012**, *116*, 4712–4719)

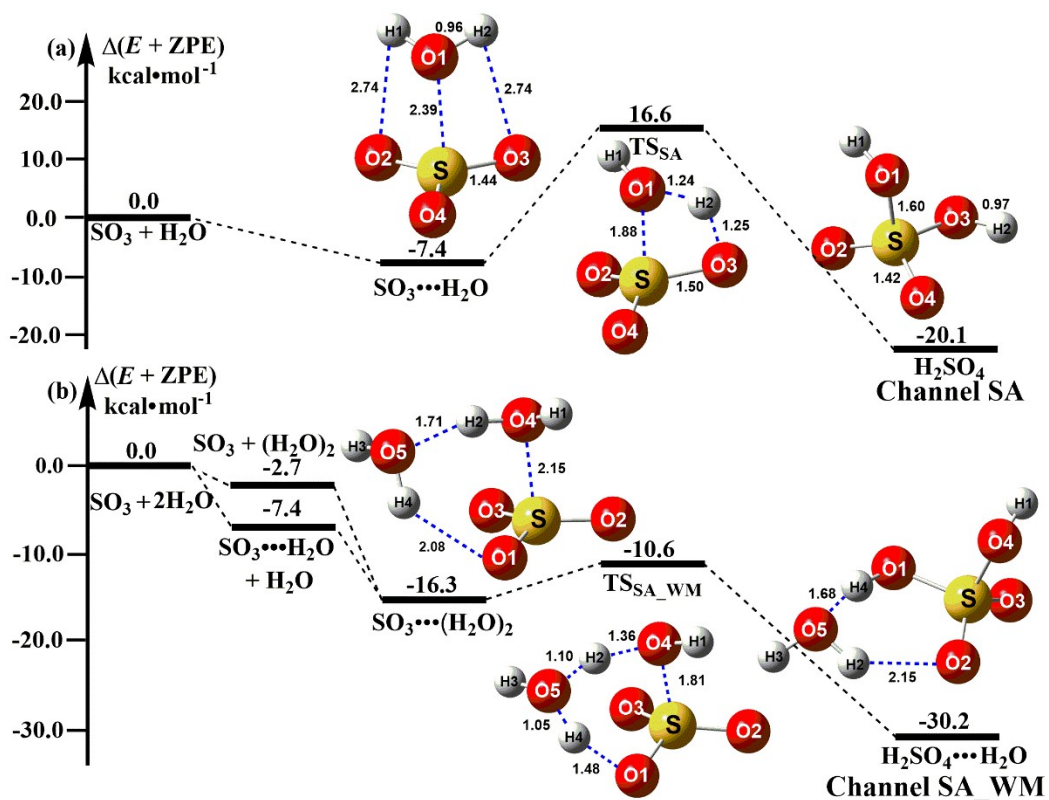

**Fig. S2** Schematic energy diagrams for the hydrolysis reaction of  $\text{SO}_3$  without (a) and with (b)  $\text{H}_2\text{O}$  at the CCSD(T)-F12/cc-pVDZ-F12//MP2/6-311+G(3d,2p) level of theory

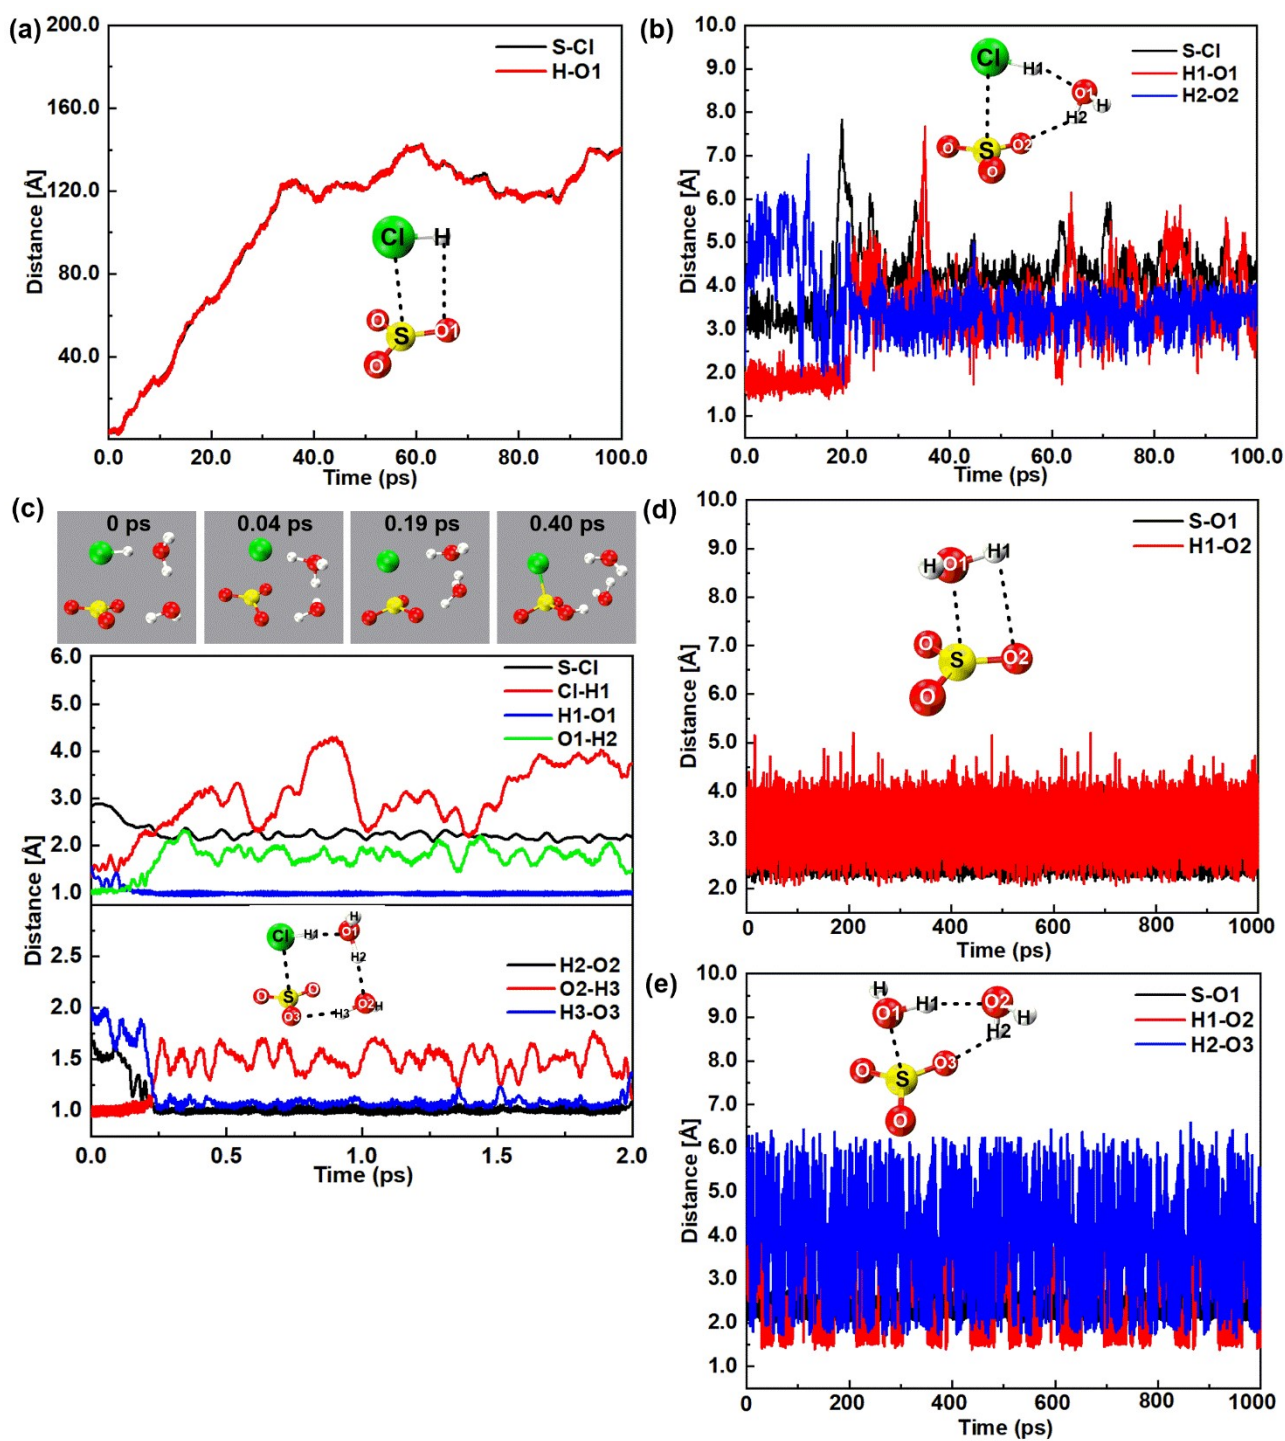

**Fig. S3** The simulated trajectories of SO<sub>3</sub> + HCl reaction (a), H<sub>2</sub>O catalyzed SO<sub>3</sub> + HCl reaction (b), (H<sub>2</sub>O)<sub>2</sub> catalyzed SO<sub>3</sub> + HCl reaction (c), SO<sub>3</sub> + H<sub>2</sub>O reaction (d), and H<sub>2</sub>O catalyzed SO<sub>3</sub> + H<sub>2</sub>O reaction (e) in the gas phase

## Part 1. Calculations of reaction rate coefficients

The kinetics for the  $\text{SO}_3 \cdots (\text{H}_2\text{O})_n$  ( $n = 0-2$ ) + HCl reaction were calculated by adopting a Master Equation Solver for Multi Energy-well Reactions (MESMER) code.<sup>1</sup> The  $\text{SO}_3 \cdots (\text{H}_2\text{O})_n$  ( $n = 0-2$ ) + HCl reaction begins with the formation of the pre-reactive reactant complex  $\text{SO}_3 \cdots (\text{H}_2\text{O})_n \cdots \text{HCl}$  ( $n = 0-2$ ) through barrierless bimolecular association reactions between  $\text{SO}_3 \cdots (\text{H}_2\text{O})_n$  ( $n = 0-2$ ) and HCl, then  $\text{SO}_3 \cdots (\text{H}_2\text{O})_n \cdots \text{HCl}$  ( $n = 0-2$ ) goes through a unimolecular transformation through the TS to form  $\text{ClSO}_3\text{H} \cdots (\text{H}_2\text{O})_n$  ( $n = 0-2$ ).

The inverse Laplace transformation method has been used to carry out the kinetic calculations for the barrierless bimolecular reaction steps ( $\text{SO}_3 \cdots (\text{H}_2\text{O})_n$  ( $n = 0-2$ ) + HCl  $\rightarrow$   $\text{SO}_3 \cdots (\text{H}_2\text{O})_n \cdots \text{HCl}$  ( $n = 0-2$ )). Rate coefficients for unimolecular steps ( $\text{SO}_3 \cdots (\text{H}_2\text{O})_n \cdots \text{HCl}$  ( $n = 0-2$ )  $\rightarrow$   $\text{ClSO}_3\text{H} \cdots (\text{H}_2\text{O})_n$  ( $n = 0-2$ )) have been calculated using the Rice-Ramsperger-Kessel-Marcus (RRKM) theory as implemented in MESMER software [1], and has been shown in eqn. (S1) and (S2), has been shown in eqn. (S1) and eqn. (S2), respectively.

$$k(E) = \kappa \cdot \frac{\sigma m^\ddagger g_e^\ddagger}{\sigma^\ddagger m g_e} \cdot \frac{E(E - E_0)}{h \rho(E)} \quad (\text{S1})$$

$$k(T) = \frac{1}{Q(\beta)} \int_0^\infty k(E) \rho(E) \exp(-\beta E) dE \quad (\text{S2})$$

In eqn. (S1) and eqn. (S2),  $\sigma$  and  $\sigma^\ddagger$  are respectively the external rotational symmetry numbers for the reactants and transition state;  $m$  and  $m^\ddagger$  is respectively the numbers of optical isomer for the reactants and transition state;  $g_e$  and  $g_e^\ddagger$  is respectively the electronic state degeneracy for the reactants and transition state;  $E_0$  is the reaction critical energy;  $E(E - E_0)$  is the sum of states of the transition state;  $\rho(E)$  is the density of states of the reactants and  $Q(\beta)$  is the corresponding canonical partition function. For the bath gas ( $\text{N}_2$ ) and reactants ( $\text{SO}_3$  and HCl), the collisional energy-transfer process was simulated in a single exponential-down model with the  $\langle \Delta E_{\text{down}} \rangle = 200 \text{ cm}^{-1}$ . The Lennard-Jones parameters for the reaction of  $\text{SO}_3$  ( $\epsilon/k_B = 318.4 \text{ K}$  and  $\sigma = 4.175 \text{ \AA}$ ) and HCl ( $\epsilon/k_B = 344.7 \text{ K}$  and  $\sigma = 3.339 \text{ \AA}$ ) were estimated by Gilbert and Smith method<sup>2</sup> and the parameters ( $\epsilon/k_B = 71.4 \text{ K}$  and  $\sigma = 3.798 \text{ \AA}$ ) of bath gas ( $\text{N}_2$ ) was taken from the reference.<sup>3</sup>

### Reference:

- [1] Gilbert, R.G., Smith, S.C., Theory of unimolecular and recombination reactions. **1990**.
- [2] Glowacki, D.R., Liang, C.H., Morley, C., Pilling, M.J., Robertson, S.H., *J. Phys. Chem. A.*, **2012**, 116, 9545-9560.
- [3] Mai, T.V.T., Duong, M.V., Nguyen, H.T., Huynh, L.K., *Phys. Chem. Chem. Phys.*, **2018**, 20, 6677-6687

**Table S7** Rate coefficient ( $\text{cm}^3 \cdot \text{molecule}^{-1} \cdot \text{s}^{-1}$ ) for the  $\text{SO}_3 + \text{HCl}$  reaction without and with  $\text{H}_2\text{O}$ , and  $(\text{H}_2\text{O})_2$  as well as the hydrolysis of  $\text{SO}_3$  without and with  $\text{H}_2\text{O}$  within the temperature range of 280-320 K at 0 km

| Catalysts      | $T$ (K)              | 280 K                  | 290 K                  | 298 K                                                | 300 K                  | 310 K                  | 320 K                  |
|----------------|----------------------|------------------------|------------------------|------------------------------------------------------|------------------------|------------------------|------------------------|
| Channel CSA    | $k_{\text{CSA}}$     | $2.16 \times 10^{-27}$ | $4.53 \times 10^{-27}$ | $8.20 \times 10^{-27}$                               | $9.51 \times 10^{-27}$ | $1.98 \times 10^{-26}$ | $4.07 \times 10^{-26}$ |
| Channel CSA_WM | $k_{\text{CSA\_WM}}$ | $5.81 \times 10^{-15}$ | $5.23 \times 10^{-15}$ | $4.82 \times 10^{-15}$                               | $4.73 \times 10^{-15}$ | $4.30 \times 10^{-15}$ | $3.93 \times 10^{-15}$ |
| Channel CSA_WD | $k_{\text{CSA\_WD}}$ | $5.65 \times 10^{-11}$ | $4.90 \times 10^{-11}$ | $4.33 \times 10^{-11}$                               | $3.26 \times 10^{-11}$ | $2.72 \times 10^{-11}$ | $2.26 \times 10^{-11}$ |
| Channel SA     | $k_{\text{SA}}$      | $1.66 \times 10^{-24}$ | $2.18 \times 10^{-24}$ | $2.76 \times 10^{-24}$<br>$(1.50 \times 10^{-23})^a$ | $2.94 \times 10^{-24}$ | $4.09 \times 10^{-24}$ | $5.81 \times 10^{-24}$ |
| Channel SA_WM  | $k_{\text{SA\_WM}}$  | $3.74 \times 10^{-13}$ | $3.19 \times 10^{-13}$ | $2.81 \times 10^{-13}$<br>$(1.40 \times 10^{-12})^a$ | $2.72 \times 10^{-13}$ | $2.32 \times 10^{-13}$ | $1.99 \times 10^{-13}$ |

$k_{\text{CSA}}$ ,  $k_{\text{CSA\_WM}}$ ,  $k_{\text{CSA\_WD}}$ ,  $k_{\text{SA}}$  and  $k_{\text{SA\_WM}}$  are denoted the rate coefficient for the  $\text{SO}_3 + \text{HCl}$  reaction without and with  $\text{H}_2\text{O}$ , and  $(\text{H}_2\text{O})_2$  as well as the hydrolysis of  $\text{SO}_3$  without and with  $\text{H}_2\text{O}$ ;

<sup>a</sup> The value was taken from reference (*J. Phys. Chem. A*, **2019**, 123, 3131-3141)

1 **Table S8** Rate coefficient ( $\text{cm}^3 \cdot \text{molecule}^{-1} \cdot \text{s}^{-1}$ ) and atmospheric lifetimes ( $\tau$ , s) of  $\text{SO}_3$  for the hydrolysis of  $\text{SO}_3$   
 2 without and with  $\text{H}_2\text{O}$  within the altitudes range of 0-50 km

| $H$ (km) | $T$ (K) | $p$ (Torr) | $[\text{H}_2\text{O}]^{\text{a,b}}$ | $[\text{HCl}]^{\text{b}}$ | $[\text{HCl} \cdots \text{H}_2\text{O}]$ | $k_{\text{SA}}(T, p)$  | $\tau_{\text{SA}}$    | $k_{\text{SA\_WM}}(T, p)$ | $\tau_{\text{SA\_WM}}$ |
|----------|---------|------------|-------------------------------------|---------------------------|------------------------------------------|------------------------|-----------------------|---------------------------|------------------------|
| 0        | 298.15  | 760.00     | $4.40 \times 10^{17}$               | $3.20 \times 10^7$        | $7.31 \times 10^3$                       | $2.76 \times 10^{-24}$ | $8.22 \times 10^5$    | $2.81 \times 10^{-13}$    | $1.22 \times 10^{-3}$  |
| 5        | 259.30  | 406.75     | $1.70 \times 10^{16}$               | $2.10 \times 10^7$        | $4.46 \times 10^2$                       | $1.06 \times 10^{-24}$ | $5.55 \times 10^7$    | $5.50 \times 10^{-13}$    | $6.54 \times 10^{-2}$  |
| 10       | 229.70  | 202.16     | $3.00 \times 10^{14}$               | $2.60 \times 10^7$        | $2.33 \times 10^1$                       | $7.02 \times 10^{-25}$ | $4.75 \times 10^9$    | $9.52 \times 10^{-13}$    | $1.97 \times 10^1$     |
| 15       | 212.60  | 91.20      | $1.50 \times 10^{13}$               | $2.70 \times 10^8$        | $2.26 \times 10^1$                       | $6.19 \times 10^{-25}$ | $1.08 \times 10^{11}$ | $1.32 \times 10^{-12}$    | $1.41 \times 10^3$     |
| 20       | 215.50  | 41.04      | $4.20 \times 10^{12}$               | $2.00 \times 10^9$        | $4.17 \times 10^1$                       | $6.45 \times 10^{-25}$ | $3.69 \times 10^{11}$ | $1.21 \times 10^{-12}$    | $2.51 \times 10^4$     |
| 25       | 218.60  | 19.00      | $2.50 \times 10^{12}$               | $1.30 \times 10^9$        | $1.44 \times 10^1$                       | $6.71 \times 10^{-25}$ | $5.96 \times 10^{11}$ | $1.09 \times 10^{-12}$    | $1.01 \times 10^5$     |
| 30       | 223.70  | 8.36       | $1.50 \times 10^{12}$               | $7.90 \times 10^8$        | 4.36                                     | $7.07 \times 10^{-25}$ | $9.43 \times 10^{11}$ | $9.30 \times 10^{-13}$    | $4.83 \times 10^5$     |
| 35       | 235.10  | 3.80       | $8.90 \times 10^{11}$               | $5.10 \times 10^8$        | 1.15                                     | $7.87 \times 10^{-25}$ | $1.43 \times 10^{12}$ | $7.05 \times 10^{-13}$    | $4.28 \times 10^6$     |
| 40       | 249.90  | 2.28       | $4.80 \times 10^{11}$               | $2.70 \times 10^8$        | $2.07 \times 10^{-1}$                    | $9.45 \times 10^{-25}$ | $2.21 \times 10^{12}$ | $4.99 \times 10^{-13}$    | $5.40 \times 10^7$     |
| 45       | 266.10  | 1.06       | $2.50 \times 10^{11}$               | $1.40 \times 10^8$        | $3.68 \times 10^{-2}$                    | $1.24 \times 10^{-24}$ | $3.21 \times 10^{12}$ | $3.07 \times 10^{-13}$    | $7.88 \times 10^8$     |
| 50       | 271.00  | 0.55       | $1.20 \times 10^{11}$               | $7.50 \times 10^8$        | $8.33 \times 10^{-3}$                    | $1.38 \times 10^{-24}$ | $6.06 \times 10^{12}$ | $2.20 \times 10^{-13}$    | $6.17 \times 10^9$     |

3  $\tau_{\text{SA}}$  and  $\tau_{\text{SA\_WM}}$  are atmospheric lifetimes of  $\text{SO}_3$  for the reactions of  $\text{SO}_3 + \text{H}_2\text{O}$  and  $\text{SO}_3 \cdots \text{H}_2\text{O} + \text{H}_2\text{O}$ , respectively.

4 <sup>a</sup> The value was taken from reference (*J. Am. Chem. Soc.*, 2021, **143**, 8402-8413.)

5 <sup>b</sup> The value was taken from reference (*Aeronomy of the Middle Atmosphere: Chemistry and Physics of the Stratosphere and Mesosphere, the third revised and*  
 6 *enlarged edition, 2005.*)

7

8 **Table S9** The rate coefficient for the hydrolysis of SO<sub>3</sub> starting from SO<sub>3</sub>⋯H<sub>2</sub>O, SO<sub>3</sub>⋯H<sub>2</sub>O +HCl reaction, the hydrolysis of SO<sub>3</sub> with H<sub>2</sub>O starting from SO<sub>3</sub>⋯(H<sub>2</sub>O)<sub>2</sub>  
9 and SO<sub>3</sub>⋯(H<sub>2</sub>O)<sub>2</sub> +HCl reaction; Atmospheric lifetimes (τ, s) of SO<sub>3</sub>⋯H<sub>2</sub>O for the hydrolysis of SO<sub>3</sub> starting from SO<sub>3</sub>⋯H<sub>2</sub>O and the SO<sub>3</sub>⋯H<sub>2</sub>O + HCl reaction as well  
10 as the atmospheric lifetimes (τ, s) of SO<sub>3</sub>⋯(H<sub>2</sub>O)<sub>2</sub> for the hydrolysis of SO<sub>3</sub> with H<sub>2</sub>O starting from SO<sub>3</sub>⋯(H<sub>2</sub>O)<sub>2</sub> and the SO<sub>3</sub>⋯(H<sub>2</sub>O)<sub>2</sub> + HCl reaction within the altitude  
11 range of 0-50 km

| <i>H</i> (km) | [H <sub>2</sub> O] <sup>a</sup> | [HCl] <sup>b</sup>     | <i>k</i> <sub>1</sub>   | τ <sub>1</sub>         | <i>k</i> <sub>2</sub>    | τ <sub>2</sub>         | <i>k</i> <sub>3</sub>  | τ <sub>3</sub>          | <i>k</i> <sub>4</sub>    | τ <sub>4</sub>         |
|---------------|---------------------------------|------------------------|-------------------------|------------------------|--------------------------|------------------------|------------------------|-------------------------|--------------------------|------------------------|
| 0             | 4.40 × 10 <sup>17</sup>         | 3.20 × 10 <sup>7</sup> | 1.91 × 10 <sup>-4</sup> | 5.23 × 10 <sup>3</sup> | 1.92 × 10 <sup>-16</sup> | 1.63 × 10 <sup>8</sup> | 1.80 × 10 <sup>7</sup> | 5.55 × 10 <sup>-8</sup> | 2.88 × 10 <sup>-13</sup> | 5.07 × 10 <sup>5</sup> |
| 5             | 1.70 × 10 <sup>16</sup>         | 2.10 × 10 <sup>7</sup> | 1.45 × 10 <sup>-5</sup> | 6.88 × 10 <sup>4</sup> | 1.26 × 10 <sup>-16</sup> | 5.55 × 10 <sup>8</sup> | 5.98 × 10 <sup>6</sup> | 1.67 × 10 <sup>-7</sup> | 3.07 × 10 <sup>-13</sup> | 8.87 × 10 <sup>5</sup> |
| 10            | 3.00 × 10 <sup>14</sup>         | 2.60 × 10 <sup>7</sup> | 2.54 × 10 <sup>-6</sup> | 3.93 × 10 <sup>5</sup> | 8.30 × 10 <sup>-17</sup> | 4.75 × 10 <sup>8</sup> | 1.92 × 10 <sup>6</sup> | 5.20 × 10 <sup>-7</sup> | 3.26 × 10 <sup>-13</sup> | 7.43 × 10 <sup>5</sup> |
| 15            | 1.50 × 10 <sup>13</sup>         | 2.70 × 10 <sup>8</sup> | 1.04 × 10 <sup>-6</sup> | 9.59 × 10 <sup>5</sup> | 6.16 × 10 <sup>-17</sup> | 1.08 × 10 <sup>7</sup> | 8.09 × 10 <sup>5</sup> | 1.24 × 10 <sup>-6</sup> | 3.39 × 10 <sup>-13</sup> | 1.27 × 10 <sup>4</sup> |
| 20            | 4.20 × 10 <sup>12</sup>         | 2.00 × 10 <sup>9</sup> | 1.20 × 10 <sup>-6</sup> | 8.30 × 10 <sup>5</sup> | 6.48 × 10 <sup>-17</sup> | 3.69 × 10 <sup>6</sup> | 7.45 × 10 <sup>5</sup> | 1.34 × 10 <sup>-6</sup> | 3.29 × 10 <sup>-13</sup> | 2.14 × 10 <sup>3</sup> |
| 25            | 2.50 × 10 <sup>12</sup>         | 1.30 × 10 <sup>9</sup> | 1.41 × 10 <sup>-6</sup> | 7.09 × 10 <sup>5</sup> | 6.81 × 10 <sup>-17</sup> | 5.96 × 10 <sup>7</sup> | 6.37 × 10 <sup>5</sup> | 1.57 × 10 <sup>-6</sup> | 3.12 × 10 <sup>-13</sup> | 7.93 × 10 <sup>3</sup> |
| 30            | 1.50 × 10 <sup>12</sup>         | 7.90 × 10 <sup>8</sup> | 1.84 × 10 <sup>-6</sup> | 5.43 × 10 <sup>5</sup> | 7.31 × 10 <sup>-17</sup> | 9.43 × 10 <sup>7</sup> | 5.20 × 10 <sup>5</sup> | 1.92 × 10 <sup>-6</sup> | 2.83 × 10 <sup>-13</sup> | 3.21 × 10 <sup>3</sup> |
| 35            | 8.90 × 10 <sup>11</sup>         | 5.10 × 10 <sup>8</sup> | 3.43 × 10 <sup>-6</sup> | 2.91 × 10 <sup>5</sup> | 8.36 × 10 <sup>-17</sup> | 1.43 × 10 <sup>7</sup> | 4.62 × 10 <sup>5</sup> | 2.17 × 10 <sup>-6</sup> | 2.29 × 10 <sup>-13</sup> | 1.92 × 10 <sup>3</sup> |
| 40            | 4.80 × 10 <sup>11</sup>         | 2.70 × 10 <sup>8</sup> | 8.15 × 10 <sup>-6</sup> | 1.23 × 10 <sup>5</sup> | 9.49 × 10 <sup>-17</sup> | 2.21 × 10 <sup>7</sup> | 4.64 × 10 <sup>5</sup> | 2.15 × 10 <sup>-6</sup> | 1.72 × 10 <sup>-13</sup> | 1.60 × 10 <sup>4</sup> |
| 45            | 2.50 × 10 <sup>11</sup>         | 2.47 × 10 <sup>2</sup> | 2.24 × 10 <sup>-6</sup> | 4.47 × 10 <sup>4</sup> | 9.61 × 10 <sup>-17</sup> | 3.21 × 10 <sup>7</sup> | 3.63 × 10 <sup>5</sup> | 2.75 × 10 <sup>-6</sup> | 1.06 × 10 <sup>-13</sup> | 1.72 × 10 <sup>4</sup> |
| 50            | 1.20 × 10 <sup>11</sup>         | 5.03 × 10 <sup>1</sup> | 3.07 × 10 <sup>-6</sup> | 3.26 × 10 <sup>4</sup> | 8.49 × 10 <sup>-17</sup> | 6.06 × 10 <sup>8</sup> | 2.43 × 10 <sup>5</sup> | 4.12 × 10 <sup>-6</sup> | 7.50 × 10 <sup>-14</sup> | 1.34 × 10 <sup>5</sup> |

12 *k*<sub>1</sub> is the rate coefficient of the hydrolysis of SO<sub>3</sub> starting from SO<sub>3</sub>⋯H<sub>2</sub>O, *k*<sub>2</sub> is the rate coefficient of the SO<sub>3</sub>⋯H<sub>2</sub>O +HCl reaction, *k*<sub>3</sub> is the rate coefficient of the hydrolysis of SO<sub>3</sub> with H<sub>2</sub>O  
13 starting from SO<sub>3</sub>⋯(H<sub>2</sub>O)<sub>2</sub> and *k*<sub>4</sub> is the rate coefficient of the SO<sub>3</sub>⋯(H<sub>2</sub>O)<sub>2</sub> +HCl reaction; τ<sub>1</sub> and τ<sub>2</sub> is the atmospheric lifetime of SO<sub>3</sub>⋯H<sub>2</sub>O for the SO<sub>3</sub>⋯H<sub>2</sub>O and SO<sub>3</sub>⋯H<sub>2</sub>O + HCl reactions,  
14 respectively; τ<sub>3</sub> and τ<sub>4</sub> is the atmospheric lifetime of SO<sub>3</sub>⋯(H<sub>2</sub>O)<sub>2</sub> for the reactions of SO<sub>3</sub>⋯(H<sub>2</sub>O)<sub>2</sub> and SO<sub>3</sub>⋯(H<sub>2</sub>O)<sub>2</sub> + HCl, respectively.

15 <sup>a</sup> The values are reported from reference (*J. Am. Chem. Soc.*, **2021**, *143*, 8402-8413)

16 <sup>b</sup> The values are reported from reference (*Aeronomy of the Middle Atmosphere: Chemistry and Physics of the Stratosphere and Mesosphere, the third revised and enlarged edition, 2005.*)

17 The atmospheric lifetimes of SO<sub>3</sub>⋯H<sub>2</sub>O for the hydrolysis of SO<sub>3</sub> starting from SO<sub>3</sub>⋯H<sub>2</sub>O (τ<sub>1</sub>) and the SO<sub>3</sub>⋯H<sub>2</sub>O + HCl reaction (τ<sub>2</sub>) have been calculated and  
18 were represented as Eq. (S3) and Eq. (S4), respectively. Similarly, the atmospheric lifetimes of SO<sub>3</sub>⋯(H<sub>2</sub>O)<sub>2</sub> for the hydrolysis of SO<sub>3</sub> with H<sub>2</sub>O starting from  
19 SO<sub>3</sub>⋯(H<sub>2</sub>O)<sub>2</sub> (τ<sub>3</sub>) and the SO<sub>3</sub>⋯(H<sub>2</sub>O)<sub>2</sub> + HCl reaction (τ<sub>4</sub>) have been calculated and were represented as Eq. (S5) and Eq. (S6), respectively.

20 
$$\tau_1 = (k_1)^{-1} \tag{S3}$$

21 
$$\tau_2 = (k_2 \times [\text{HCl}])^{-1} \tag{S4}$$

22 
$$\tau_3 = (k_3)^{-1} \tag{S5}$$

23 
$$\tau_4 = (k_4 \times [\text{HCl}])^{-1} \tag{S6}$$

24 Where  $k_1$  is the rate coefficient of the hydrolysis of  $\text{SO}_3$  starting from  $\text{SO}_3 \cdots \text{H}_2\text{O}$ ,  $k_2$  is the rate coefficient of the  
25  $\text{SO}_3 \cdots \text{H}_2\text{O} + \text{HCl}$  reaction,  $k_3$  is the rate coefficient of the hydrolysis of  $\text{SO}_3$  with  $\text{H}_2\text{O}$  starting from  $\text{SO}_3 \cdots (\text{H}_2\text{O})_2$   
26 and  $k_4$  is the rate coefficient of the  $\text{SO}_3 \cdots (\text{H}_2\text{O})_2 + \text{HCl}$  reaction;  $[\text{HCl}]$  is the concentration of HCl taken from  
27 reference.<sup>1</sup>

28 As seen in Table S9, the value of  $\tau_2$  is larger by 2-5 orders of magnitude than  $\tau_1$  within the altitude range of  
29 0-50 km. This indicates that  $\text{SO}_3 \cdots \text{H}_2\text{O}$  is hydrolyzed before it collides with HCl molecules. So, the  $\text{H}_2\text{O}$ -assisted  
30  $\text{SO}_3 + \text{HCl}$  reaction occurred through  $\text{SO}_3 \cdots \text{H}_2\text{O} + \text{HCl}$  reaction is unfavorable. This is consistent with the fact that  
31  $\text{H}_2\text{O}$ -assisted  $\text{SO}_3 + \text{HCl}$  reaction is dominated by the  $\text{HCl} \cdots \text{H}_2\text{O} + \text{SO}_3$  reaction mentioned in the 3.2 section of the  
32 manuscript. Similarly, the value of  $\tau_4$  is larger by 11-13 orders of magnitude than  $\tau_3$  within the altitude range of 0-  
33 50 km, revealing  $\text{SO}_3 \cdots (\text{H}_2\text{O})_2$  is hydrolyzed before it collides with HCl molecules. These results predict that  
34  $\text{SO}_3 \cdots (\text{H}_2\text{O})_n$  ( $n = 1-2$ ) + HCl reaction is unfavorable in  $(\text{H}_2\text{O})_n$  ( $n = 1-2$ )-assisted  $\text{SO}_3 + \text{HCl}$  reaction. Thus, the  
35  $\text{SO}_3 \cdots (\text{H}_2\text{O})_n$  ( $n = 1-2$ ) + HCl reactions were not considered in  $(\text{H}_2\text{O})_n$  ( $n = 1-2$ )-assisted  $\text{SO}_3 + \text{HCl}$  reaction and  
36 only the  $\text{HCl} \cdots (\text{H}_2\text{O})_n + \text{SO}_3$  reaction has been studied in the  $(\text{H}_2\text{O})_n$  ( $n = 1-2$ )-assisted  $\text{SO}_3 + \text{HCl}$  reaction.

37 **Reference**

38 1. S. Mallick, S. Sarkar, B. Bandyopadhyay and P. Kumar, *J. Phys. Chem. A*, 2018, **122**, 350-363.

39



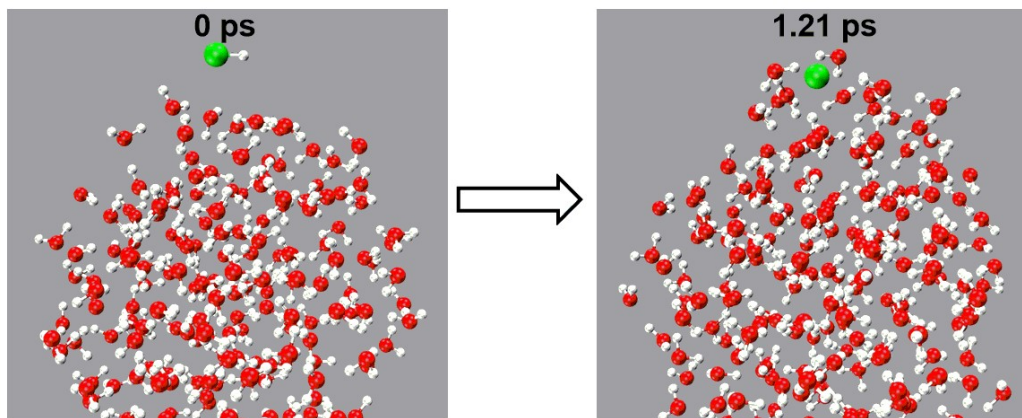

**Fig. S4** Snapshot structures taken from the BOMD simulations of HCl reaction at the air-water interface. The white, red and green spheres represent H, O and Cl atoms, respectively.

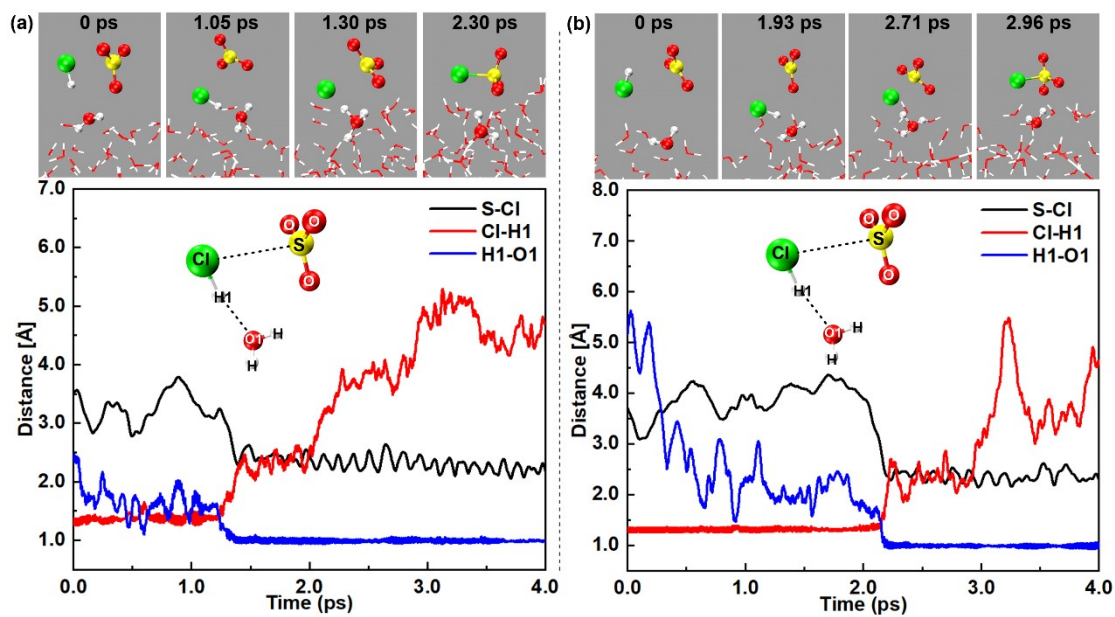

**Fig. S5** The simulated trajectories of the formation of  $\text{ClSO}_3^- \cdots \text{H}_3\text{O}^+$  ion pair from the reaction of  $\text{SO}_3$ ,  $\text{HCl}$  and one interfacial water molecular at the air-water interface

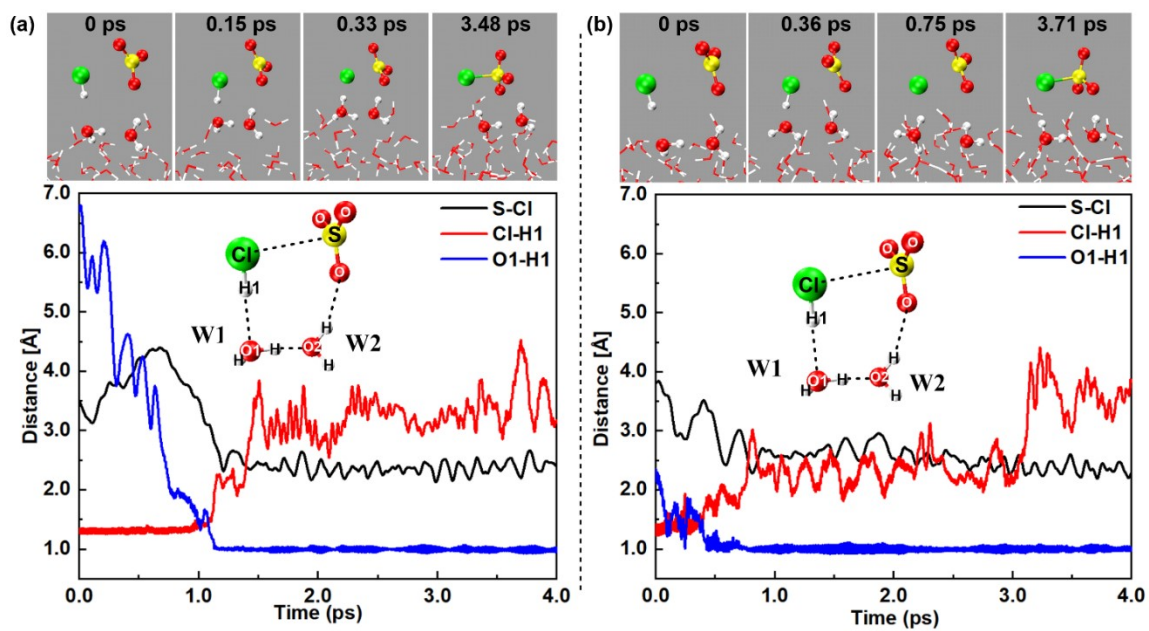

**Fig. S6** The simulated trajectories of the formation of  $\text{ClSO}_3^- \cdots \text{H}_3\text{O}^+$  ion pair from the reaction of  $\text{SO}_3$ ,  $\text{HCl}$  and two interfacial water molecular at the air-water interface

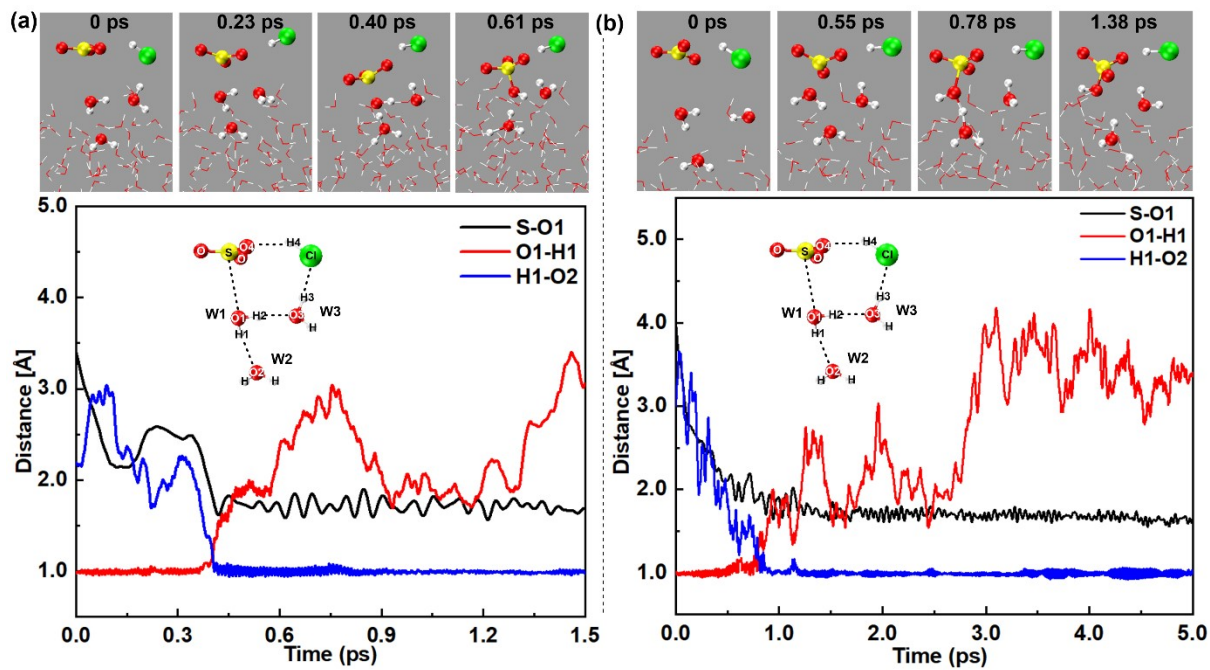

**Fig. S7** The simulated trajectories of the  $\text{HSO}_4^- \cdots \text{H}_3\text{O}^+$  ion pair formation from  $\text{SO}_3$ ,  $\text{HCl}$  and two interfacial water molecules at the air-water interface

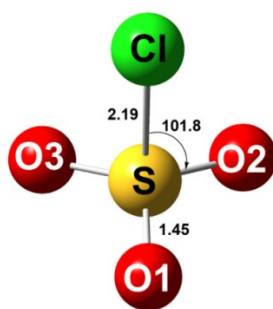

**Fig. S8** The optimized geometrical structure for the  $\text{ClSO}_3^-$  ion at the MP2/6-311+G(3d,2p) level

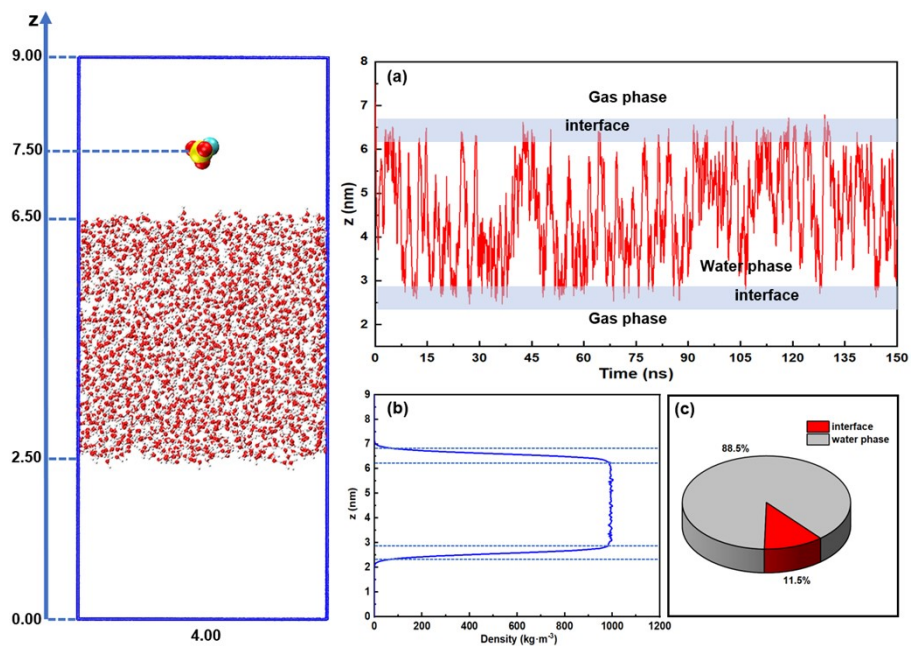

**Fig. S9** The  $z$  coordinates of  $\text{ClSO}_3^-$  ion as the function of simulation time (a), the density profile of water (b) and the pie chart with the occurrence percentages of  $\text{ClSO}_3^-$  ion (c) at the air-water interface and in water phase
